# Supplementary material for: Single-molecule magnet behaviour in a centrosymmetric dinuclear dysprosium(iii) complex: sequential differentiation of triple relaxation pathways
Source: Royal Society of Chemistry journal article supplement (doi:10.1039/d2dt00684g), 2022-01-01
Supplement: d2dt00684g1.pdf [file d2dt00684g1.pdf]

Electronic Supplementary Information (ESI) for *Dalton Transactions*

**Single-Molecule Magnet Behaviour in a Centrosymmetric Dinuclear  
Dysprosium(III) Complex: Sequential Distinguish of Triple  
Relaxation Pathways**

Xiao-Jiao Song,<sup>a,b</sup> Yu Jing,<sup>a</sup> Xin Feng,<sup>a</sup> Zhao-Bo Hu,<sup>\*c</sup> Ming Kong,<sup>a</sup> Xiao-Ming  
Xue,<sup>b</sup> Yi-Quan Zhang<sup>\*d</sup> and You Song<sup>\*a</sup>

<sup>a</sup> State Key Laboratory of Coordination Chemistry, School of Chemistry and  
Chemical Engineering, Nanjing University, Nanjing 210023, P. R. China

<sup>b</sup> Key Laboratory of National Forestry and Grassland Administration on Wildlife  
Evidence Technology, School of Criminal Science and Technology, Nanjing Forest  
Police College, Nanjing 210023, P. R. China

<sup>c</sup> Chaotic Matter Science Research Center, Department of Materials, Metallurgy and  
Chemistry, Jiangxi University of Science and Technology, Ganzhou 341000, P. R.  
China

<sup>d</sup> Jiangsu Key Lab for NSLSCS, School of Physical Science and Technology, Nanjing  
Normal University, Nanjing 210023, P. R. China

**\* Correspondence:**

Corresponding Author: Zhao-Bo Hu, Yi-Quan Zhang, You Song  
e-mail: \*huzhaobo@smail.nju.edu.cn, \*zhangyiquan@njnu.edu.cn,  
\*yousong@nju.edu.cn

## Physical Measurements

Elemental analyses of C, H and N were carried out with a PerkinElmer 240C elemental analyzer. The ratio of Dy/Y was determined with XRF (EDAX Orbis). The IR spectra were recorded with a Nicolet iS10 spectrometer using KBr pellets in the range 400-4000  $\text{cm}^{-1}$ . Powder X-ray diffraction (PXRD) were measured on a Bruker AXS D8 Advance powder diffractometer (Cu-K $\alpha$ ,  $\lambda = 1.54056 \text{ \AA}$ ), with a scan speed of 0.5 s/step and a step size of 0.01° in  $2\theta$ . Data of magnetic properties for crystalline sample were collected on a Quantum Design MPMP-XL 7 superconducting quantum interference device (SQUID) magnetometer and a Quantum Design MPMS SQUID-VSM.

**Table S1** Crystallographic data and structural refinement parameters for **Dy<sub>2</sub>**.

|                                                                                                                                | <b>Dy<sub>2</sub></b>                                                                         |
|--------------------------------------------------------------------------------------------------------------------------------|-----------------------------------------------------------------------------------------------|
| Formula                                                                                                                        | C <sub>52</sub> H <sub>56</sub> Cl <sub>2</sub> Dy <sub>2</sub> N <sub>6</sub> O <sub>8</sub> |
| f w                                                                                                                            | 1288.93                                                                                       |
| <i>T</i> / K                                                                                                                   | 296(2)                                                                                        |
| $\lambda$ / $\text{\AA}$                                                                                                       | 0.71073                                                                                       |
| Crystal system                                                                                                                 | Monoclinic                                                                                    |
| Space group                                                                                                                    | <i>P</i> 2 <sub>1</sub> / <i>c</i>                                                            |
| <i>a</i> / $\text{\AA}$                                                                                                        | 13.122(4)                                                                                     |
| <i>b</i> / $\text{\AA}$                                                                                                        | 10.371(3)                                                                                     |
| <i>c</i> / $\text{\AA}$                                                                                                        | 19.538(6)                                                                                     |
| $\alpha$ / °                                                                                                                   | 90                                                                                            |
| $\beta$ / °                                                                                                                    | 103.71(3)                                                                                     |
| $\gamma$ / °                                                                                                                   | 90                                                                                            |
| <i>V</i> / $\text{\AA}^3$                                                                                                      | 2585.5(13)                                                                                    |
| <i>Z</i>                                                                                                                       | 2                                                                                             |
| <i>D<sub>c</sub></i> / g cm <sup>-3</sup>                                                                                      | 1.656                                                                                         |
| $\mu$ / mm <sup>-1</sup>                                                                                                       | 3.030                                                                                         |
| <i>F</i> (000)                                                                                                                 | 1280.0                                                                                        |
| $\theta$ / °                                                                                                                   | 2.144~27.594                                                                                  |
| Reflns collected, Reflns unique                                                                                                | 21796, 5934                                                                                   |
| <i>R</i> <sub>int</sub>                                                                                                        | 0.0671                                                                                        |
| GOF on <i>F</i> <sup>2</sup>                                                                                                   | 1.028                                                                                         |
| <i>R</i> <sub>1</sub> [ <i>I</i> > 2 $\sigma$ ( <i>I</i> )] <sup>[a]</sup> , <i>R</i> <sub>1</sub> (all data) <sup>[a]</sup>   | 0.0437, 0.0499                                                                                |
| <i>wR</i> <sub>2</sub> [ <i>I</i> > 2 $\sigma$ ( <i>I</i> )] <sup>[b]</sup> , <i>wR</i> <sub>2</sub> (all data) <sup>[b]</sup> | 0.1288, 0.1301                                                                                |
| Largest diff. Peak, hole / (e $\text{\AA}^{-3}$ )                                                                              | 1.286, -1.801                                                                                 |

<sup>[a]</sup> $R_1 = \sum ||F_o| - |F_c|| / \sum |F_o|$ ; <sup>[b]</sup> $wR_2 = [\sum w(F_o^2 - F_c^2)^2 / \sum w(F_o^2)^2]^{1/2}$

**Table S2** Selected bond lengths (Å) and angles (°) for **Dy<sub>2</sub>**.

| Bond lengths around Dy1   |            |            |            |
|---------------------------|------------|------------|------------|
| Dy1-O1                    | 2.190(3)   | Dy1-O2     | 2.239(3)   |
| Dy1-O3                    | 2.398(3)   | Dy1-O4     | 2.240(3)   |
| Dy1-N1                    | 2.492(4)   | Dy1-N2     | 2.504(3)   |
| Dy1-Cl1                   | 2.681(11)  |            |            |
| Bond angles including Dy1 |            |            |            |
| O1-Dy1-O2                 | 144.96(12) | O1-Dy1-O3  | 76.61(13)  |
| O1-Dy1-O4                 | 86.74(13)  | O2-Dy1-O3  | 71.87(12)  |
| O2-Dy1-O4                 | 81.03(12)  | O4-Dy1-O3  | 94.69(13)  |
| O1-Dy1-N1                 | 72.61(13)  | O2-Dy1-N1  | 141.55(12) |
| O3-Dy1-N1                 | 145.56(12) | O4-Dy1-N1  | 98.57(12)  |
| O1-Dy1-N2                 | 136.29(13) | O2-Dy1-N2  | 73.83(12)  |
| O3-Dy1-N2                 | 145.69(12) | O4-Dy1-N2  | 80.67(12)  |
| N1-Dy1-N2                 | 68.25(12)  | O1-Dy1-Cl1 | 105.26(10) |
| O2-Dy1-Cl1                | 90.24(9)   | O3-Dy1-Cl1 | 90.74(10)  |
| O4-Dy1-Cl1                | 167.72(9)  | N1-Dy1-Cl1 | 82.88(9)   |
| N2-Dy1-Cl1                | 88.63(8)   |            |            |

**Table S3** Deviation parameters calculated by SHAPE for seven-coordinated Dy (III) center in **Dy<sub>2</sub>**. The best match is displayed in bold with blue color.

| Geometry      | Point group                  | Polyhedron                                | Dy1          |
|---------------|------------------------------|-------------------------------------------|--------------|
| HP-7          | <i>D</i> <sub>7h</sub>       | Heptagon                                  | 22.876       |
| HPY-7         | <i>C</i> <sub>6v</sub>       | Hexagonal pyramid                         | 19.259       |
| PBPY-7        | <i>D</i> <sub>5h</sub>       | Pentagonal bipyramid                      | 6.894        |
| COC-7         | <i>C</i> <sub>3v</sub>       | Capped octahedron                         | 11.038       |
| CTPR-7        | <i>C</i> <sub>2v</sub>       | Capped trigonal prism                     | 8.146        |
| <b>JBPY-7</b> | <b><i>D</i><sub>5h</sub></b> | <b>Johnson pentagonal bipyramid (J13)</b> | <b>4.180</b> |
| JETPY-7       | <i>C</i> <sub>3v</sub>       | Elongated triangular pyramid (J7)         | 17.210       |

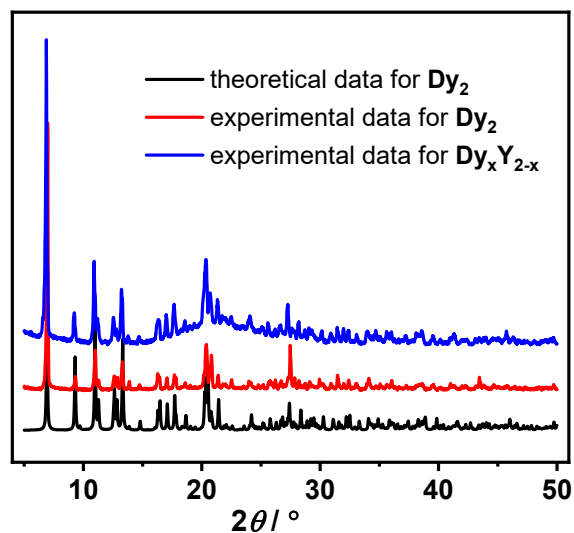

**Fig. S1** The theoretical X-ray powder diffraction patterns (black), the experimental ones of  $Dy_2$  (red) and  $Dy_xY_{2-x}$  (blue).

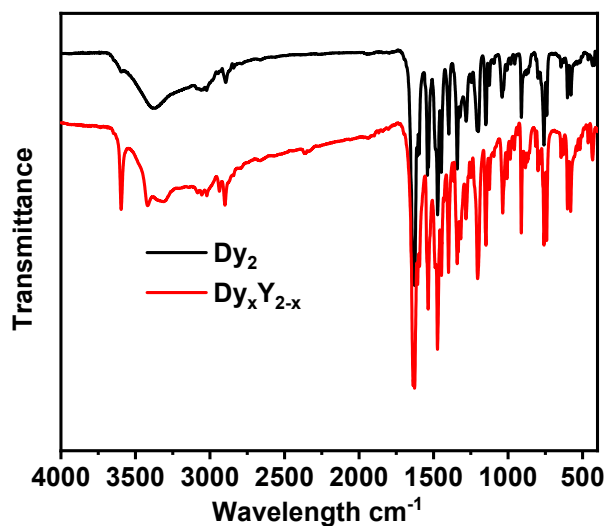

**Fig. S2** The FT-IR spectra of  $Dy_2$  (black) and  $Dy_xY_{2-x}$  (red).

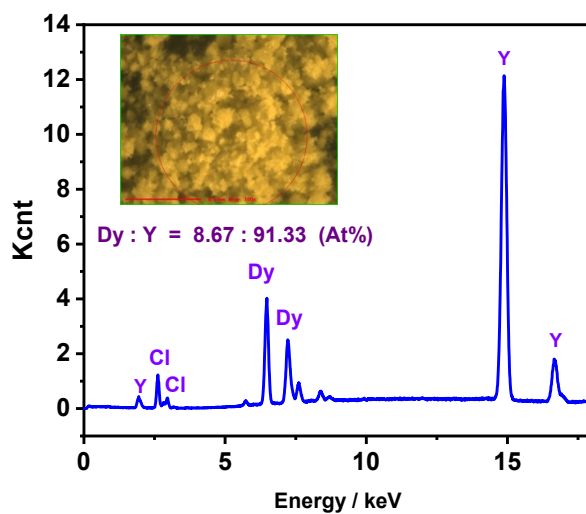

**Fig. S3** Energy spectrum of  $Dy_xY_{2-x}$ .

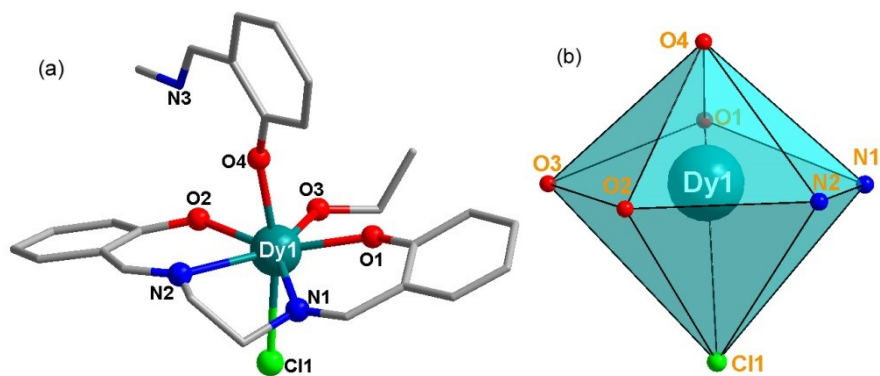

**Fig. S4** (a) Perspective view of the asymmetric unit of  $\text{Dy}_2$ , (b) the coordination geometry of Dy(III) ion in  $\text{Dy}_2$ .

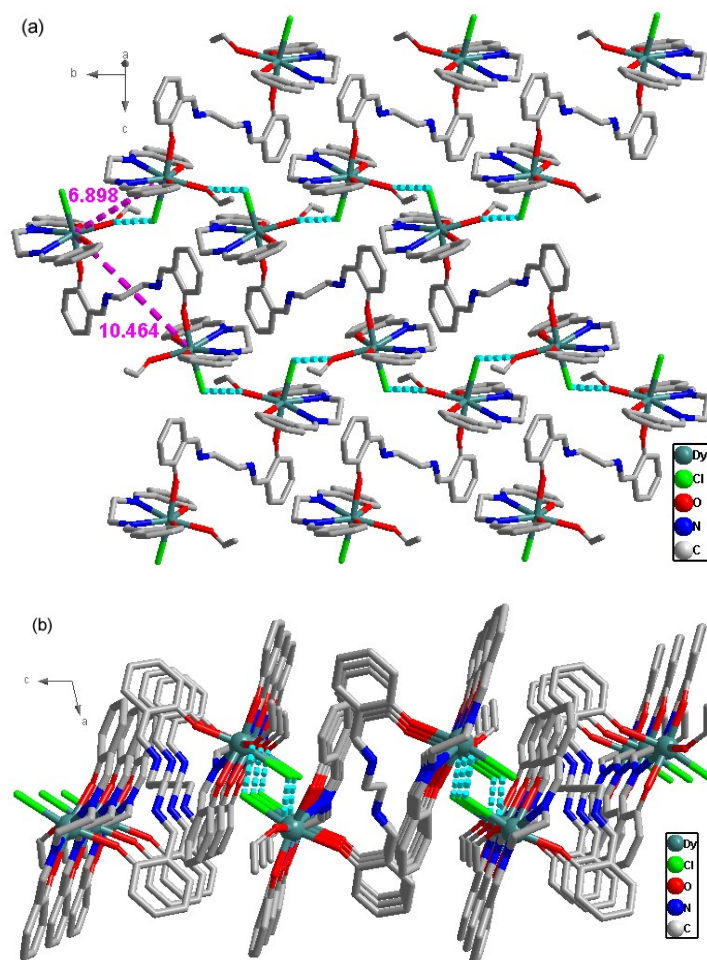

**Fig. S5** (a) The 2D network of  $\text{Dy}_2$  in the  $bc$  plane formed via hydrogen bonds, the shortest interdimer  $\text{Dy}\cdots\text{Dy}$  separation is 6.898 Å, while the  $\text{Dy}\cdots\text{Dy}$  distance within the dinuclear molecule is 10.464 Å. (b) View of the network along the  $b$  direction.

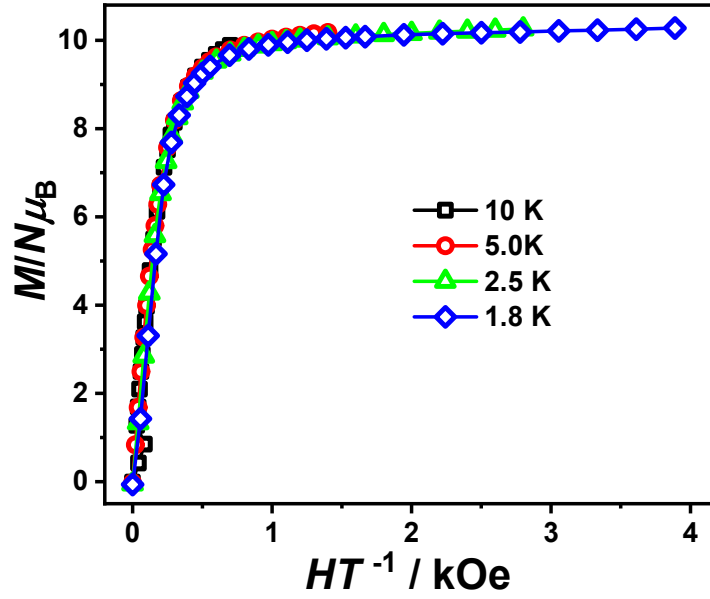

Fig. S6 Plots of  $M$  vs  $H/T$  for  $\text{Dy}_2$  at 1.8, 2.5, 5.0 and 10 K.

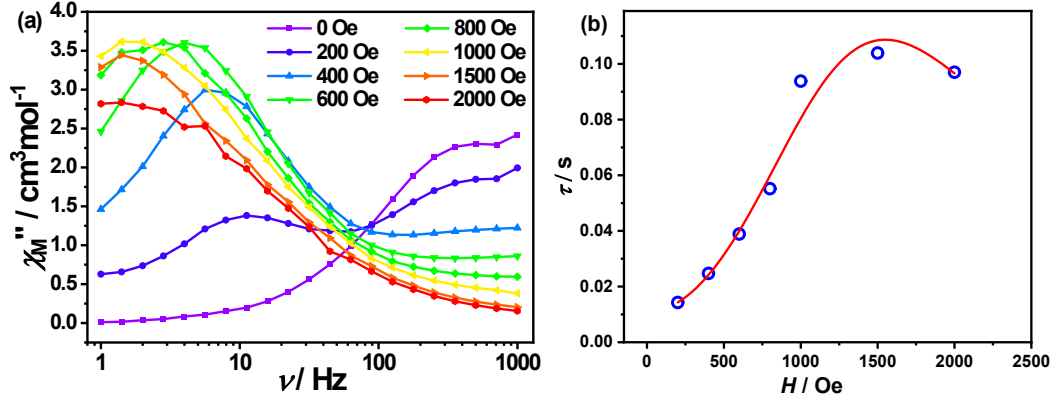

Fig. S7 (a)  $\chi''_M$  vs.  $\nu$  plot at 1.8 K in the frequency range of 1-1000 Hz under various applied dc field for  $\text{Dy}_2$ . (b) Field-dependence of the relaxation time (blue circles) and the best fit curve (red line) for  $\text{Dy}_2$ .

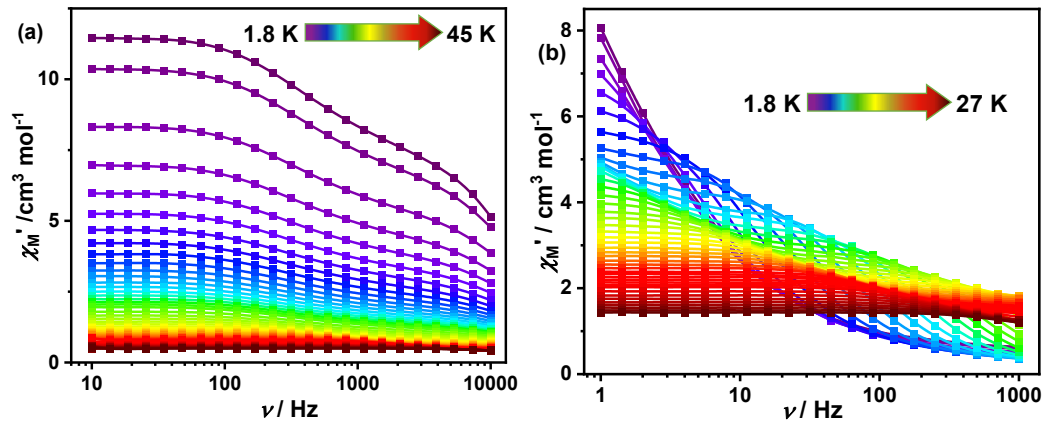

Fig. S8 Frequency-dependent of in-phase ( $\chi'_M$ ) ac susceptibilities under zero field (a) and under 1.5 kOe dc field (b) for  $\text{Dy}_2$ .

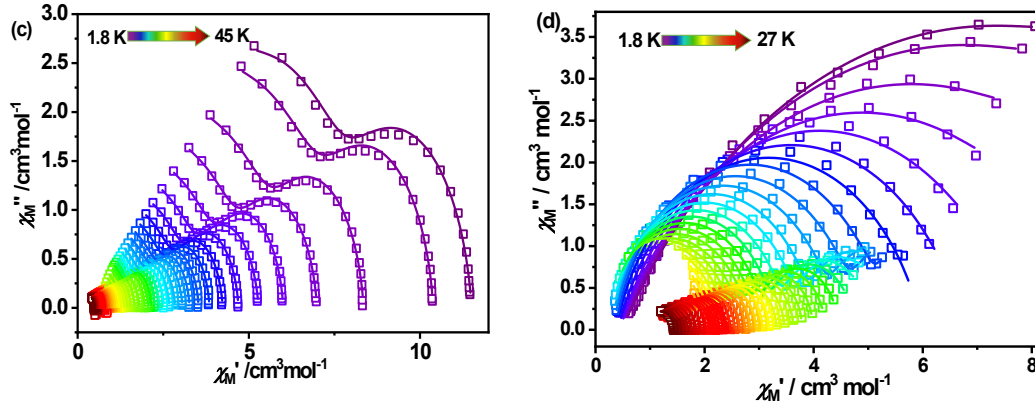

**Fig. S9** Cole-Cole curves under zero dc-field (a) and under 1.5 kOe (b) for  $\text{Dy}_2$ . Solid lines represent the best fit with extended Debye model.

**Table S4** The best-fitted parameters obtained from the analyses of the Cole-Cole plots using the extended Debye model for  $\text{Dy}_2$  under zero field.

| $T / \text{K}$ | $\chi_s(\text{total}) / \text{cm}^3 \text{mol}^{-1}$ | $\Delta\chi_1 / \text{cm}^3 \text{mol}^{-1}$ | $\ln(\tau_1 / \text{s})$ | $\alpha_1$ | $\Delta\chi_2 / \text{cm}^3 \text{mol}^{-1}$ | $\ln(\tau_2 / \text{s})$ | $\alpha_2$ | $R^2$    |
|----------------|------------------------------------------------------|----------------------------------------------|--------------------------|------------|----------------------------------------------|--------------------------|------------|----------|
| 1.8            | 2.22637                                              | 3.80538                                      | -7.42174                 | 0.11629    | 5.47416                                      | -11.5272                 | 0.07449    | 0.07321  |
| 2              | 1.13894                                              | 3.25038                                      | -7.409                   | 0.10128    | 5.99599                                      | -11.5615                 | 0.15906    | 0.06844  |
| 2.5            | 0.45584                                              | 2.59914                                      | -7.42457                 | 0.09735    | 5.2956                                       | -11.6221                 | 0.198      | 0.04594  |
| 3              | 0.17147                                              | 2.22266                                      | -7.42598                 | 0.10622    | 4.59887                                      | -11.6721                 | 0.20965    | 0.01969  |
| 3.5            | 2.50E-13                                             | 1.91166                                      | -7.43447                 | 0.10409    | 4.09645                                      | -11.6985                 | 0.22325    | 0.01399  |
| 4              | 4.03E-13                                             | 1.73023                                      | -7.43589                 | 0.11549    | 3.55491                                      | -11.7209                 | 0.21778    | 0.00876  |
| 4.5            | 3.18E-13                                             | 1.51608                                      | -7.42881                 | 0.10107    | 3.18424                                      | -11.7432                 | 0.22587    | 0.01841  |
| 5              | 4.76E-13                                             | 1.38504                                      | -7.42881                 | 0.10601    | 2.85336                                      | -11.7676                 | 0.22376    | 0.01053  |
| 5.5            | 8.00E-13                                             | 1.25263                                      | -7.43872                 | 0.09946    | 2.6016                                       | -11.7852                 | 0.22811    | 0.01148  |
| 6              | 5.63E-13                                             | 1.15394                                      | -7.45287                 | 0.09966    | 2.38418                                      | -11.8098                 | 0.23028    | 0.01086  |
| 6.5            | 5.36E-13                                             | 1.07261                                      | -7.45146                 | 0.10002    | 2.19978                                      | -11.8368                 | 0.2318     | 0.00945  |
| 7              | 4.95E-13                                             | 1.04319                                      | -7.46561                 | 0.12073    | 2.02294                                      | -11.8792                 | 0.2257     | 0.00591  |
| 7.5            | 7.93E-13                                             | 0.95838                                      | -7.47976                 | 0.11172    | 1.89248                                      | -11.9005                 | 0.22831    | 0.00439  |
| 8              | 9.95E-13                                             | 0.91098                                      | -7.48725                 | 0.11444    | 1.77641                                      | -11.9292                 | 0.23196    | 0.00559  |
| 8.5            | 1.69E-12                                             | 0.84579                                      | -7.50699                 | 0.1053     | 1.67595                                      | -11.9523                 | 0.23446    | 0.00533  |
| 9              | 2.75E-12                                             | 0.80939                                      | -7.51885                 | 0.1088     | 1.57898                                      | -11.9842                 | 0.23232    | 0.00299  |
| 9.5            | 3.66E-12                                             | 0.74331                                      | -7.52956                 | 0.08875    | 1.5114                                       | -12                      | 0.24336    | 0.00477  |
| 10             | 4.44E-12                                             | 0.70457                                      | -7.54317                 | 0.08202    | 1.44073                                      | -12.0287                 | 0.24741    | 0.00451  |
| 10.5           | 5.88E-12                                             | 0.69677                                      | -7.57034                 | 0.09603    | 1.36304                                      | -12.0747                 | 0.2421     | 0.00391  |
| 11             | 7.85E-12                                             | 0.66175                                      | -7.60147                 | 0.08963    | 1.30203                                      | -12.1104                 | 0.24295    | 0.00333  |
| 12             | 9.47E-12                                             | 0.60665                                      | -7.6595                  | 0.07873    | 1.19521                                      | -12.1976                 | 0.24612    | 0.00266  |
| 13             | 1.21E-11                                             | 0.56731                                      | -7.73733                 | 0.07241    | 1.09943                                      | -12.3181                 | 0.24506    | 0.00177  |
| 14             | 1.19E-11                                             | 0.52959                                      | -7.81269                 | 0.06139    | 1.02078                                      | -12.4788                 | 0.25346    | 0.0016   |
| 15             | 1.99E-11                                             | 0.50009                                      | -7.92391                 | 0.05417    | 0.94864                                      | -12.6912                 | 0.26223    | 7.81E-04 |
| 16             | 4.89E-11                                             | 0.46112                                      | -8.03778                 | 0.03379    | 0.89577                                      | -12.9619                 | 0.29817    | 0.00113  |
| 17             | 1.37E-10                                             | 0.43076                                      | -8.17381                 | 0.01799    | 0.84303                                      | -13.2756                 | 0.32504    | 0.00134  |

|    |          |         |          |          |         |          |          |          |
|----|----------|---------|----------|----------|---------|----------|----------|----------|
| 18 | 3.49E-10 | 0.41806 | -8.29907 | 0.02009  | 0.79222 | -13.6765 | 0.35456  | 9.57E-04 |
| 19 | 2.42E-21 | 0.40083 | -8.42318 | 0.02151  | 0.75101 | -14.1635 | 0.40614  | 4.11E-04 |
| 20 | 4.53E-21 | 0.39783 | -8.5713  | 0.02965  | 0.69702 | -14.5082 | 0.37879  | 3.99E-04 |
| 21 | 3.29E-21 | 0.37924 | -8.70915 | 0.02037  | 0.66084 | -14.8249 | 0.38394  | 3.16E-04 |
| 22 | 2.11E-21 | 0.37639 | -8.83329 | 0.03263  | 0.62199 | -15.2084 | 0.37363  | 2.43E-04 |
| 23 | 4.70E-21 | 0.36885 | -8.9569  | 0.03569  | 0.58924 | -15.4957 | 0.35317  | 2.71E-04 |
| 24 | 7.80E-21 | 0.34786 | -9.07716 | 0.02177  | 0.56659 | -15.5789 | 0.35078  | 1.24E-04 |
| 25 | 1.09E-20 | 0.33591 | -9.18958 | 0.01211  | 0.54174 | -15.2541 | 0.25318  | 0.00312  |
| 26 | 2.74E-20 | 0.32294 | -9.30111 | 0.00757  | 0.52011 | -15.1956 | 0.21078  | 0.00141  |
| 27 | 2.81E-20 | 0.31329 | -9.40996 | 0.00858  | 0.49982 | -15.3115 | 0.18999  | 0.0037   |
| 28 | 5.55E-23 | 0.31469 | -9.52568 | 0.03305  | 0.4762  | -17.1733 | 0.34232  | 0.01051  |
| 29 | 5.24E-23 | 0.28839 | -9.64753 | 2.78E-15 | 0.46561 | -16.9374 | 0.35154  | 0.0047   |
| 30 | 1.09E-22 | 0.28098 | -9.75779 | 1.36E-14 | 0.44765 | -14.8999 | 3.27E-08 | 0.00851  |
| 31 | 1.03E-22 | 0.27572 | -9.81616 | 1.66E-14 | 0.43687 | -14.9739 | 4.66E-08 | 0.00194  |
| 32 | 8.86E-23 | 0.26685 | -9.91949 | 2.12E-14 | 0.42139 | -15.1071 | 6.89E-08 | 0.00137  |
| 33 | 8.85E-23 | 0.2591  | -10.0283 | 2.67E-14 | 0.40802 | -15.2011 | 9.62E-08 | 0.00466  |
| 34 | 9.20E-23 | 0.25326 | -10.1088 | 3.33E-14 | 0.39802 | -15.3229 | 1.35E-07 | 0.00218  |
| 35 | 8.75E-23 | 0.24621 | -10.2226 | 4.27E-14 | 0.38526 | -15.4921 | 1.90E-07 | 0.00479  |
| 36 | 9.21E-23 | 0.24048 | -10.3122 | 6.34E-14 | 0.3757  | -15.6548 | 1.65E-07 | 0.00219  |
| 37 | 9.93E-23 | 0.23411 | -10.4311 | 8.91E-14 | 0.36367 | -15.7877 | 1.75E-07 | 0.00197  |
| 38 | 1.16E-22 | 0.22789 | -10.5376 | 1.12E-13 | 0.35416 | -15.8257 | 1.79E-07 | 0.00659  |
| 39 | 1.40E-22 | 0.22371 | -10.6709 | 1.59E-13 | 0.34148 | -16.2156 | 2.89E-07 | 0.00321  |
| 40 | 3.11E-22 | 0.21692 | -10.7653 | 1.14E-13 | 0.33562 | -15.862  | 3.77E-08 | 0.00972  |
| 41 | 3.43E-22 | 0.21164 | -10.8811 | 1.52E-13 | 0.32769 | -15.8822 | 3.72E-08 | 0.00556  |
| 42 | 1.13E-22 | 0.20372 | -10.9449 | 2.48E-13 | 0.32694 | -15.9893 | 5.24E-08 | 0.00523  |
| 43 | 1.55E-22 | 0.20589 | -11.1451 | 3.02E-13 | 0.30818 | -16.6812 | 7.29E-08 | 0.00286  |
| 44 | 1.80E-23 | 0.19322 | -11.1967 | 4.17E-18 | 0.3132  | -15.9567 | 1.84E-07 | 0.00374  |
| 45 | 3.38E-23 | 0.1953  | -11.3805 | 4.69E-18 | 0.29838 | -16.7962 | 1.80E-07 | 0.00165  |

$$\chi_{T1} = \chi_s(\text{Total}) + \Delta\chi_1, \chi_{T2} = \chi_s(\text{Total}) + \Delta\chi_1 + \Delta\chi_2$$

**Table S5** The best-fitted parameters obtained from the analyses of the Cole-Cole plots using the extended Debye model for **Dy<sub>2</sub>** under 1.5 kOe dc field.

| <i>T</i> / K | $\chi_s(\text{Total}) / \text{cm}^3 \text{mol}^{-1}$ | $\Delta\chi_1 / \text{cm}^3 \text{mol}^{-1}$ | $\ln(\tau / \text{s})$ | $\alpha$ | $\Delta\chi_2 / \text{cm}^3 \text{mol}^{-1}$ | $\ln(\tau / \text{s})$ | $\alpha$ | $R^2$   |
|--------------|------------------------------------------------------|----------------------------------------------|------------------------|----------|----------------------------------------------|------------------------|----------|---------|
| 5            | 0.36662                                              | 4.8601                                       | -5.02426               | 0.13191  | 3.52078                                      | -0.63583               | 9.53E-08 | 0.03767 |
| 5.5          | 0.33193                                              | 4.38866                                      | -5.49088               | 0.1132   | 2.00161                                      | -1.0561                | 1.99E-07 | 0.01872 |
| 6            | 0.30277                                              | 3.99807                                      | -5.92808               | 0.09455  | 1.88567                                      | -1.51264               | 6.01E-09 | 0.01153 |
| 6.5          | 0.296                                                | 3.62183                                      | -6.34813               | 0.06942  | 1.78394                                      | -1.94292               | 1.54E-08 | 0.02245 |
| 7            | 2.61E-01                                             | 3.42518                                      | -6.69349               | 0.07508  | 1.64951                                      | -2.26477               | 2.44E-08 | 0.0045  |
| 7.5          | 2.44E-01                                             | 3.18631                                      | -7.03614               | 0.06837  | 1.58686                                      | -2.59206               | 4.08E-08 | 0.00675 |
| 8            | 2.41E-01                                             | 2.97446                                      | -7.3542                | 0.05881  | 1.49704                                      | -2.90742               | 7.53E-08 | 0.00453 |
| 8.5          | 2.09E-01                                             | 2.83282                                      | -7.65622               | 0.06478  | 1.40192                                      | -3.19793               | 5.18E-08 | 0.00522 |
| 9            | 1.88E-01                                             | 2.68717                                      | -7.94628               | 0.06695  | 1.32934                                      | -3.47028               | 9.84E-08 | 0.00286 |



|      |          |         |          |          |         |          |          |          |
|------|----------|---------|----------|----------|---------|----------|----------|----------|
| 9.5  | 1.79E-01 | 2.55793 | -8.2171  | 0.07011  | 1.25156 | -3.73246 | 9.84E-08 | 0.00501  |
| 10   | 1.18E-01 | 2.48201 | -8.51553 | 0.07987  | 1.18839 | -4.02019 | 2.67E-07 | 0.00568  |
| 10.5 | 3.70E-02 | 2.44629 | -8.81349 | 0.09069  | 1.14561 | -4.23403 | 3.71E-07 | 0.00522  |
| 11   | 4.63E-15 | 2.36845 | -9.09656 | 0.09122  | 1.09348 | -4.50292 | 7.57E-07 | 0.00269  |
| 11.5 | 5.59E-15 | 2.25969 | -9.35168 | 0.08363  | 1.05445 | -4.73458 | 1.09E-06 | 0.00338  |
| 12   | 7.54E-15 | 2.16445 | -9.60883 | 0.07811  | 1.01562 | -4.95203 | 2.11E-06 | 0.00445  |
| 12.5 | 1.23E-14 | 2.07588 | -9.83641 | 0.07544  | 0.98309 | -5.15482 | 2.10E-06 | 0.0031   |
| 13   | 1.49E-14 | 1.99539 | -10.0972 | 0.07416  | 0.94162 | -5.36982 | 3.03E-06 | 0.00194  |
| 13.5 | 1.75E-14 | 1.92276 | -10.3415 | 0.07171  | 0.90679 | -5.57001 | 4.25E-06 | 0.00261  |
| 14   | 2.55E-15 | 1.85255 | -10.626  | 0.07862  | 0.88655 | -5.76185 | 8.19E-06 | 0.00332  |
| 14.5 | 3.74E-15 | 1.78503 | -10.8432 | 0.06602  | 0.85311 | -5.9344  | 1.09E-05 | 0.00138  |
| 15   | 3.41E-15 | 1.73706 | -11.2378 | 0.12766  | 0.80946 | -6.09631 | 1.70E-05 | 0.00132  |
| 15.5 | 3.80E-15 | 1.68747 | -11.7475 | 0.18558  | 0.78439 | -6.2509  | 2.17E-05 | 6.53E-04 |
| 16   | 3.25E-15 | 1.64433 | -12.6346 | 0.31895  | 0.74256 | -6.40693 | 3.21E-05 | 0.00163  |
| 16.5 | 2.22E-15 | 1.60272 | -12.9059 | 0.33586  | 0.72558 | -6.53681 | 6.75E-05 | 6.81E-04 |
| 17   | 5.42E-15 | 1.54818 | -13.3508 | 0.33835  | 0.7146  | -6.68289 | 3.96E-05 | 5.18E-04 |
| 17.5 | 4.40E-15 | 1.48968 | -12.9444 | 0.19007  | 0.70462 | -6.83151 | 5.24E-05 | 8.43E-04 |
| 18   | 6.86E-15 | 1.46027 | -14.5383 | 0.40128  | 0.67575 | -6.95989 | 7.79E-05 | 2.98E-04 |
| 18.5 | 6.86E-15 | 1.41869 | -14.2519 | 0.34165  | 0.65787 | -7.08156 | 9.69E-05 | 3.27E-04 |
| 19   | 9.06E-15 | 1.34013 | -40.1444 | 0.25505  | 0.68218 | -7.2498  | 1.82E-04 | 2.87E-03 |
| 20   | 5.00E-27 | 1.26685 | -39.063  | 0.22283  | 0.65758 | -7.47028 | 5.47E-04 | 5.64E-03 |
| 21   | 4.86E-27 | 1.22229 | -39.127  | 0.29842  | 0.6098  | -7.65726 | 7.92E-04 | 2.88E-03 |
| 22   | 9.61E-27 | 1.1824  | -38.8621 | 0.2662   | 0.56773 | -7.84299 | 1.04E-16 | 7.72E-04 |
| 23   | 9.22E-27 | 1.14065 | -38.633  | 0.35945  | 0.5349  | -8.01168 | 1.16E-16 | 4.44E-04 |
| 24   | 1.62E-26 | 1.09751 | -38.635  | 4.52E-05 | 0.51158 | -8.17522 | 1.93E-16 | 4.66E-04 |
| 25   | 2.33E-26 | 1.08131 | -38.6951 | 2.98E-05 | 0.46532 | -8.3431  | 2.64E-16 | 0.00258  |
| 26   | 2.52E-26 | 1.0268  | -38.7327 | 3.72E-05 | 0.45836 | -8.50064 | 3.47E-16 | 1.02E-04 |
| 27   | 2.85E-26 | 0.99673 | -38.7751 | 4.12E-05 | 0.43909 | -8.63956 | 4.43E-16 | 2.12E-04 |

$$\chi_{T1} = \chi_S(\text{Total}) + \Delta\chi_1, \chi_{T2} = \chi_S(\text{Total}) + \Delta\chi_1 + \Delta\chi_2$$

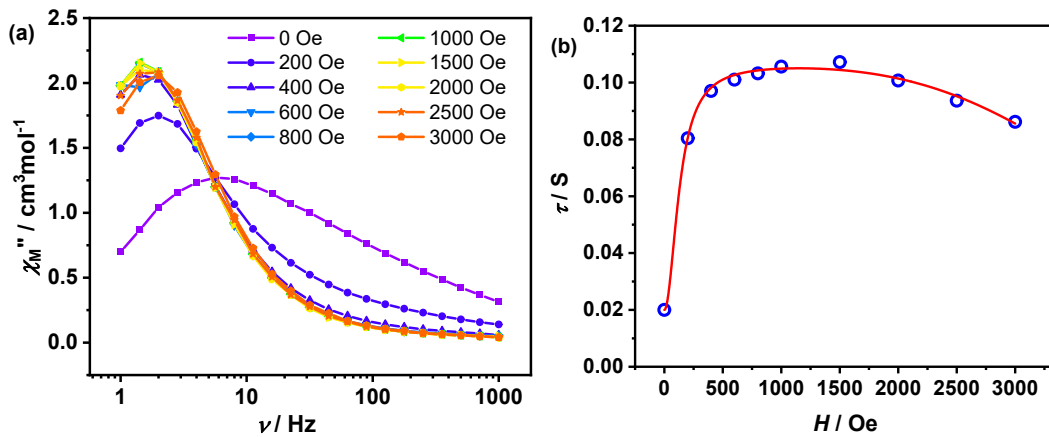

**Fig. S10** (a)  $\chi''_M$  vs.  $\nu$  plot at 1.8 K in the frequency range of 1-1000 Hz under various applied dc for  $\text{Dy}_x\text{Y}_{2-x}$ . (b) Field-dependence of the relaxation time (blue circles) and the best fit curve (red line) for  $\text{Dy}_x\text{Y}_{2-x}$ .

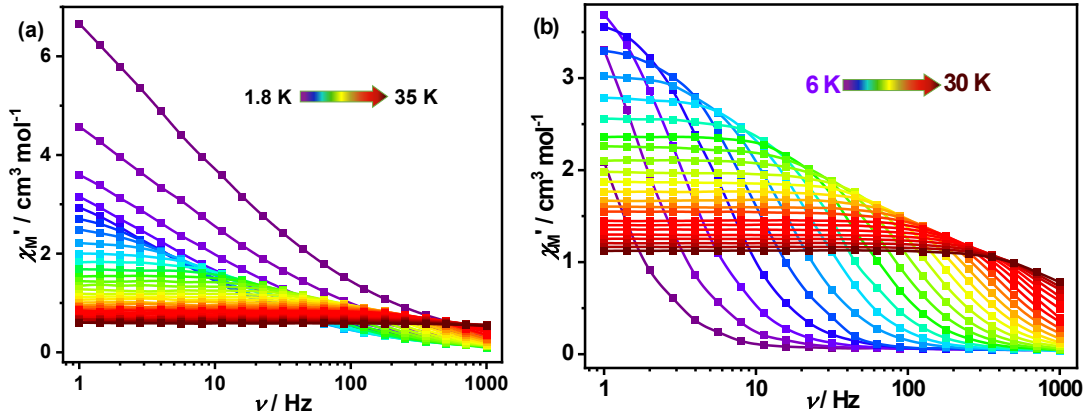

**Fig. S11** Frequency-dependent of in-put phase ( $\chi_M'$ ) ac susceptibilities under zero field (a) and under 1.5 kOe dc field (b) for  $\text{Dy}_x\text{Y}_{2-x}$ .

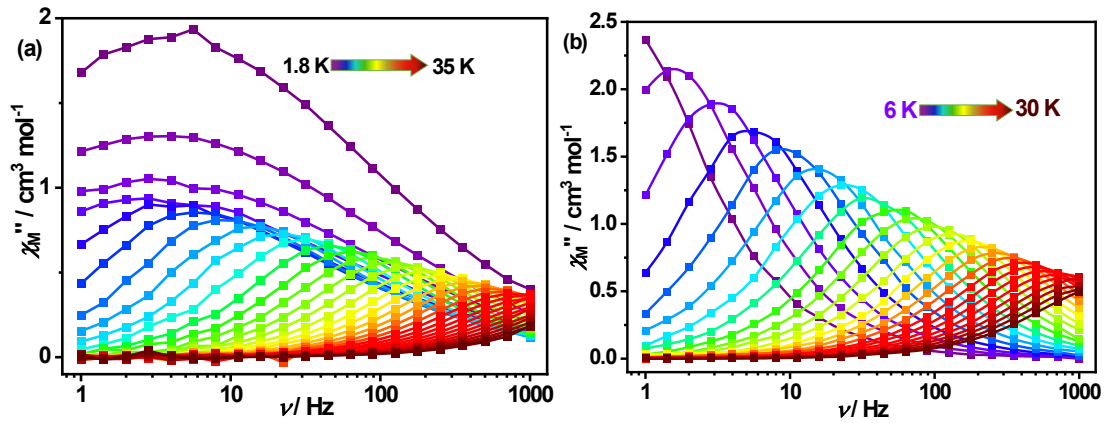

**Fig. S12** Frequency-dependent of out-put phase ( $\chi_M''$ ) AC susceptibilities under zero field (a) and under 1.5 kOe dc field (b) for  $\text{Dy}_x\text{Y}_{2-x}$ .

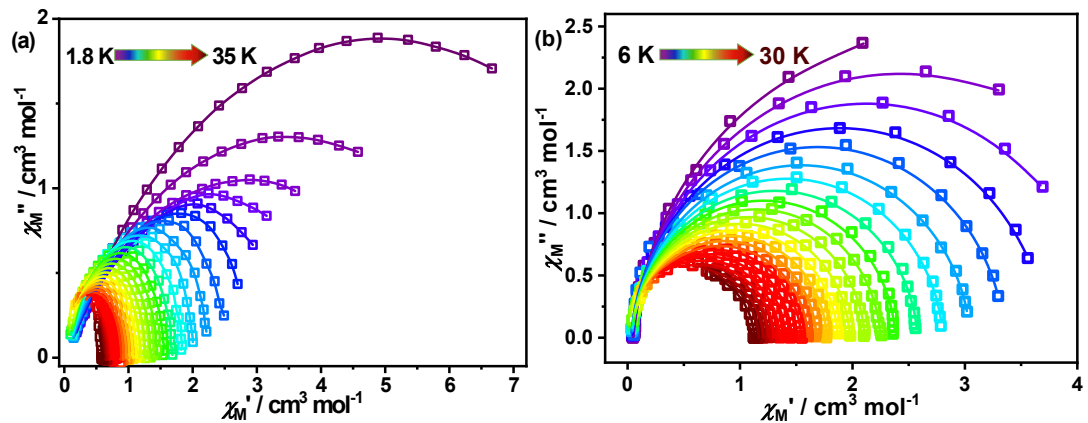

**Fig. S13** Cole–Cole curves under zero DC-field (a) and under 1.5 kOe (b) for  $\text{Dy}_x\text{Y}_{2-x}$ . Solid lines represent the best fit with Debye model.

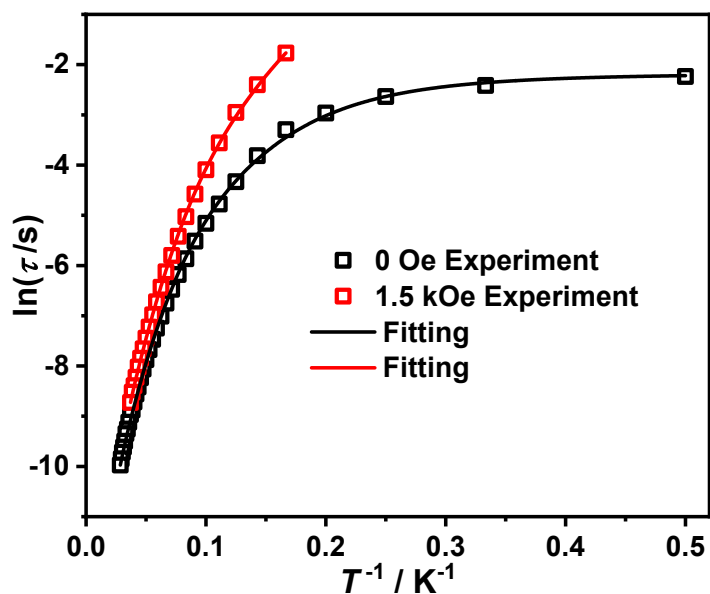

**Fig. S14** Plot of  $\ln(\tau)$  versus  $T^{-1}$  under zero field (a) and under 1.5 kOe dc field (b) for  $\mathbf{Dy}_x\mathbf{Y}_{2-x}$ .

**Table S6** The best-fitted parameters obtained from the analyses of the Cole-Cole plots using the Debye model for  $\mathbf{Dy}_x\mathbf{Y}_{2-x}$  under zero field.

| $T / \text{K}$ | $\chi_s(\text{Total}) / \text{cm}^3 \text{mol}^{-1}$ | $\Delta\chi / \text{cm}^3 \text{mol}^{-1}$ | $\ln(\tau / \text{s})$ | $\alpha$ | $R^2$    |
|----------------|------------------------------------------------------|--------------------------------------------|------------------------|----------|----------|
| 2              | 1.27E-08                                             | 9.52517                                    | -2.23676               | 0.51406  | 0.03324  |
| 3              | 1.89E-08                                             | 6.66498                                    | -2.41469               | 0.51973  | 0.02208  |
| 4              | 2.07E-08                                             | 5.38905                                    | -2.63711               | 0.52318  | 0.00996  |
| 5              | 2.30E-08                                             | 4.71353                                    | -2.964                 | 0.51306  | 0.00468  |
| 6              | 3.05E-08                                             | 4.07911                                    | -3.29513               | 0.48206  | 0.02933  |
| 7              | 2.57E-08                                             | 3.37327                                    | -3.81284               | 0.42306  | 0.07014  |
| 8              | 1.08E-07                                             | 2.813                                      | -4.33221               | 0.35771  | 0.11158  |
| 9              | 3.75E-07                                             | 2.4141                                     | -4.77619               | 0.29969  | 0.10496  |
| 10             | 8.20E-07                                             | 2.12797                                    | -5.15991               | 0.25411  | 0.08521  |
| 11             | 1.52E-06                                             | 1.91187                                    | -5.51532               | 0.21763  | 0.0622   |
| 12             | 2.35E-06                                             | 1.72677                                    | -5.86441               | 0.18242  | 0.04554  |
| 13             | 3.38E-06                                             | 1.58472                                    | -6.17954               | 0.15863  | 0.03412  |
| 14             | 5.07E-06                                             | 1.46569                                    | -6.47463               | 0.13943  | 0.02787  |
| 15             | 7.93E-06                                             | 1.36951                                    | -6.74753               | 0.12586  | 2.03E-02 |
| 16             | 3.11E-02                                             | 1.26253                                    | -7.00996               | 0.08812  | 0.01173  |
| 17             | 7.93E-02                                             | 1.19083                                    | -7.24723               | 0.05093  | 0.00183  |
| 18             | 6.97E-02                                             | 1.1271                                     | -7.46913               | 0.04904  | 0.00148  |
| 19             | 5.59E-02                                             | 1.07223                                    | -7.67483               | 0.05237  | 2.15E-03 |
| 20             | 6.41E-02                                             | 1.01482                                    | -7.87551               | 0.03882  | 0.00201  |
| 21             | 6.10E-02                                             | 0.96616                                    | -8.06325               | 0.03631  | 2.20E-03 |
| 22             | 6.48E-02                                             | 0.92116                                    | -8.23563               | 0.02744  | 0.00154  |
| 23             | 1.03E-01                                             | 0.87835                                    | -8.41837               | 0.00565  | 4.47E-03 |

|    |          |         |          |          |          |
|----|----------|---------|----------|----------|----------|
| 24 | 5.42E-02 | 0.84599 | -8.55838 | 0.02975  | 0.00143  |
| 25 | 2.75E-02 | 0.81336 | -8.71904 | 0.04094  | 0.00198  |
| 26 | 3.63E-02 | 0.78339 | -8.87831 | 0.04016  | 0.00295  |
| 27 | 1.70E-12 | 0.75857 | -8.96779 | 0.0434   | 0.00132  |
| 28 | 2.61E-12 | 0.73119 | -9.12088 | 0.04512  | 0.00123  |
| 29 | 4.02E-12 | 0.70582 | -9.25776 | 0.0419   | 9.09E-04 |
| 30 | 4.46E-12 | 0.67993 | -9.34709 | 0.02072  | 0.00134  |
| 31 | 5.84E-12 | 0.663   | -9.50092 | 0.04779  | 0.00134  |
| 32 | 9.60E-12 | 0.64221 | -9.61578 | 0.02294  | 0.00282  |
| 33 | 1.14E-11 | 0.61961 | -9.71696 | 0.02146  | 0.0016   |
| 34 | 1.77E-11 | 0.60487 | -9.84768 | 0.01784  | 0.00221  |
| 35 | 2.61E-11 | 0.58767 | -9.97155 | 4.45E-08 | 0.0025   |

$$\chi_T = \chi_S(\text{Total}) + \Delta\chi$$

**Table S7** The best-fitted parameters obtained from the analyses of the Cole-Cole plots using the Debye model for  $\mathbf{D}_{y_x}\mathbf{Y}_{2-x}$  under 1.5 Oe dc field.

| $T / \text{K}$ | $\chi_S(\text{Total}) / \text{cm}^3 \text{mol}^{-1}$ | $\Delta\chi / \text{cm}^3 \text{mol}^{-1}$ | $\ln(\tau / \text{s})$ | $\alpha$ | $R^2$    |
|----------------|------------------------------------------------------|--------------------------------------------|------------------------|----------|----------|
| 6              | 0.05                                                 | 5.43002                                    | -1.77093               | 0.06207  | 0.0038   |
| 7              | 0.04486                                              | 4.7983                                     | -2.40222               | 0.06295  | 0.00282  |
| 8              | 0.04477                                              | 4.20578                                    | -2.95274               | 0.05445  | 0.00353  |
| 9              | 0.04292                                              | 3.72778                                    | -3.55767               | 0.04742  | 0.00645  |
| 10             | 3.23E-02                                             | 3.3522                                     | -4.09399               | 0.04068  | 0.01129  |
| 11             | 3.97E-02                                             | 3.04742                                    | -4.57873               | 0.0422   | 0.00284  |
| 12             | 3.48E-02                                             | 2.80509                                    | -5.02742               | 0.04157  | 0.00536  |
| 13             | 3.87E-02                                             | 2.5783                                     | -5.41766               | 0.03617  | 0.00602  |
| 14             | 3.96E-02                                             | 2.38082                                    | -5.80081               | 0.0284   | 0.00604  |
| 15             | 3.59E-02                                             | 2.2489                                     | -6.12706               | 0.0344   | 0.00399  |
| 16             | 3.65E-02                                             | 2.1084                                     | -6.43552               | 0.03206  | 0.00115  |
| 17             | 4.37E-02                                             | 1.97553                                    | -6.7224                | 0.02456  | 0.00105  |
| 18             | 4.50E-02                                             | 1.8678                                     | -6.98316               | 0.02382  | 0.00274  |
| 19             | 4.06E-02                                             | 1.7706                                     | -7.2257                | 0.02432  | 8.82E-04 |
| 20             | 4.50E-02                                             | 1.67754                                    | -7.44788               | 0.02085  | 0.00161  |
| 21             | 4.30E-02                                             | 1.60214                                    | -7.65878               | 0.02533  | 0.00103  |
| 22             | 4.11E-02                                             | 1.54407                                    | -7.84744               | 0.03103  | 0.00129  |
| 23             | 6.67E-02                                             | 1.45481                                    | -8.02276               | 0.0105   | 9.31E-04 |
| 24             | 1.74E-02                                             | 1.40596                                    | -8.22723               | 0.02959  | 0.00113  |
| 25             | 2.41E-02                                             | 1.35441                                    | -8.39337               | 0.03486  | 7.26E-04 |
| 26             | 6.12E-02                                             | 1.29854                                    | -8.52249               | 0.02546  | 0.00118  |
| 27             | 1.54E-15                                             | 1.25375                                    | -8.72611               | 0.03362  | 8.19E-04 |

$$\chi_T = \chi_S(\text{Total}) + \Delta\chi$$

### Details of *ab initio* calculations

For centrosymmetric binuclear  $\text{Dy}_2$ , the type two individual of Dy (III) fragments were calculated. Complete-active-space self-consistent field (CASSCF) calculations on individual Dy(III) fragments (recorded as Dy1 and Dy1a, as show in Figure S11) on the basis of single-crystal X-ray determined geometry have been carried out with MOLCAS 8.4 program package.<sup>[S1-S5]</sup> Each individual Dy(III) fragment was calculated keeping the experimentally determined structure while the other Dy(III) ion was replaced by diamagnetic Lu(III). The Calculated results are the same for fragments Dy1 and Dy1a, as shown in Table S8 and S9.

The basis sets for all atoms are atomic natural orbitals from the MOLCAS ANORCC library: ANO-RCC-VTZP for Dy(III); VDZP for close O; VDZ for distant atoms. The calculations employed the second order Douglas-Kroll-Hess Hamiltonian, where scalar relativistic contractions were taken into account in the basis set and the spin-orbit couplings were handled separately in the restricted active space state interaction (RASSI-SO) procedure. For individual Dy(III) fragment, active electrons in 7 active spaces include all  $f$  electrons (CAS(9 in 7)) in the CASSCF calculation. To exclude all the doubts, we calculated all the roots in the active space. We have mixed the maximum number of spin-free state which was possible with our hardware (all from 21 sextets, 128 from 224 quadruplets, 130 from 490 doublets). SINGLE\_ANISO program was used to obtain the magnetic susceptibilities, energy levels,  $g$  tensors,  $m_j$  values, magnetic axes, *et al.*, based on the above CASSCF/RASSI-SO calculations.<sup>[S2-S8]</sup>

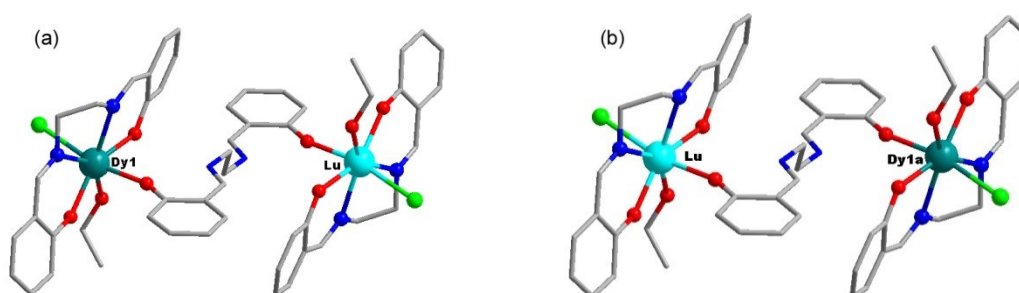

**Fig. S15** Calculated Dy(III) fragment of  $\text{Dy}_2$ .

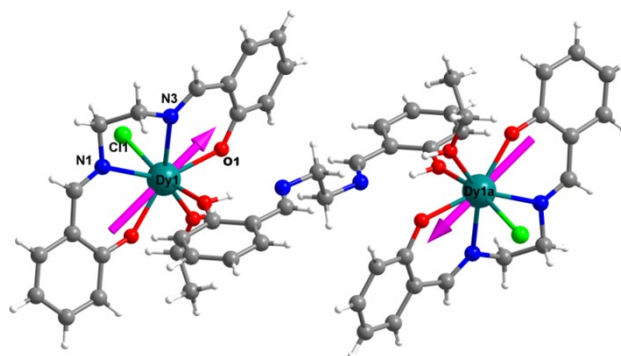

**Fig. S16** The orientations of the anisotropy axes of the individual Dy(III) centres in  $\text{Dy}_2$ . Symmetry codes:  $a = 1 - x, -y, 1 - z$ .

**Table S8** Calculated energy levels ( $\text{cm}^{-1}$ ),  $g$  ( $g_x, g_y, g_z$ ) tensors and  $m_J$  values of the lowest eight Kramers doublets (KDs) of individual fragments in  $\text{Dy}_2$ .

| KDs | individual fragments Dy1 and Dy1a in $\text{Dy}_2$ |                          |            |
|-----|----------------------------------------------------|--------------------------|------------|
|     | $E / \text{cm}^{-1}$                               | $g$                      | $m_J$      |
| 1   | 0.0                                                | 0.004<br>0.007<br>19.755 | $\pm 15/2$ |
| 2   | 291.7                                              | 0.082<br>0.104<br>16.863 | $\pm 13/2$ |
| 3   | 538.4                                              | 1.073<br>1.288<br>13.736 | $\pm 11/2$ |
| 4   | 674.7                                              | 4.397<br>6.104<br>9.055  | $\pm 9/2$  |
| 5   | 741.8                                              | 1.025<br>4.518<br>12.645 | $\pm 3/2$  |
| 6   | 810.3                                              | 0.275<br>1.667<br>14.450 | $\pm 7/2$  |
| 7   | 878.4                                              | 0.105<br>2.253<br>15.793 | $\pm 1/2$  |
| 8   | 904.5                                              | 0.700<br>2.264<br>17.193 | $\pm 5/2$  |

**Table S9** Wave functions with definite projection of the total moment  $|m_J\rangle$  for the lowest two Kramers doublets (KDs) of individual fragments Dy1 and Dy1a in  $\text{Dy}_2$ .

|           | $E / \text{cm}^{-1}$ | wave functions                                   |
|-----------|----------------------|--------------------------------------------------|
| Dy1, Dy1a | 0.0                  | 97.6% $ \pm 15/2\rangle$                         |
|           | 291.7                | 95.8% $ \pm 13/2\rangle$ +2.8% $ \pm 9/2\rangle$ |

**Table S10** Exchange energies  $E$  ( $\text{cm}^{-1}$ ), the energy differences between each exchange doublets  $\Delta_t$  ( $\text{cm}^{-1}$ ) and the main values of the  $g_z$  for the lowest two exchange doublets of  $\text{Dy}_2$ .

|   | $E$ | $\Delta_t$           | $g_z$ |
|---|-----|----------------------|-------|
| 1 | 0.0 | $1.0 \times 10^{-7}$ | 0.034 |

|   |       |                      |        |
|---|-------|----------------------|--------|
| 2 | 0.449 | $3.8 \times 10^{-8}$ | 39.521 |
|---|-------|----------------------|--------|

To fit the exchange interaction of **Dy**<sub>2</sub>, two steps were adopted to obtain parameters. Firstly, we calculated the individual Dy(III) fragment using CASSCF/RASSI-SO to obtain the corresponding magnetic properties. Then, the exchange interaction between the magnetic centres is considered within the Lines model, while the account of the dipole-dipole magnetic interaction is treated exactly.<sup>[S9]</sup> The Lines model is effective and has been widely used in the research field of *d* and *f*-elements single-molecule magnets.<sup>[S10,S11]</sup>

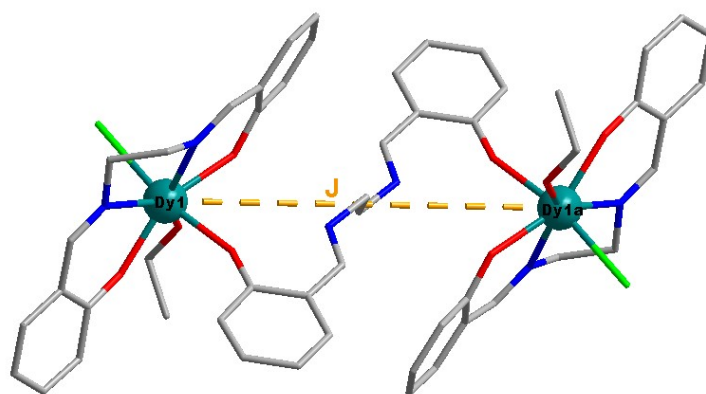

**Fig. S17** Scheme of the Dy<sup>III</sup>...Dy<sup>III</sup> magnetic couplings in **Dy**<sub>2</sub>. Symmetry codes: a = 1 - x, -y, 1 - z.

The Ising exchange Hamiltonians for **Dy**<sub>2</sub> is as shown in equation (1). Total coupling constants  $J_{total}$  that include dipole-dipole interaction ( $J_{dip}$ ) and exchange coupling parameters ( $J_{exch}$ ), as shown in equation (2). The dipole-dipole interaction ( $J_{dip}$ ) is calculated with equation (3).

$$\hat{H}_{exch} = -J_{total} \hat{S}_{Dy1} \hat{S}_{Dy1a} \quad (1)$$

$$J_{total} = J_{dip} + J_{exch} \quad (2)$$

$$J_{dip} = -\frac{\mu_B^2 g_{1z} g_{2z}}{r^3} (\cos \theta - 3 \cos \varphi_1 \cos \varphi_2) \quad (3)$$

where  $\theta$  is the angle between the main anisotropy axes on both Dy sites;  $\varphi_1$  is the angle between the main magnetic axis on site 1 (Dy1) with the unit vector connecting the two Dy sites ( $n_{12}$ );  $\varphi_2$  is the angle between the main magnetic axis on site 2 (Dy1a) with the unit vector connecting the two Dy sites ( $n_{12}$ );  $g_{1z}$  is the Z component of the ground g tensor on site 1;  $g_{2z}$  is the Z component of the ground g tensor on site 2;  $\mu_B^2$  is a constant (= 0.4329701512063995) in units of cm<sup>-1</sup>/Tesla;  $r$  is the distance between the Dy1 and Dy1a, in Angstrom.

The parameters of calculation results are  $\theta = 0$ ,  $\varphi_1 = \varphi_2 = 47.923^\circ$ ,  $g_{1z} = g_{2z} = 19.75536463$ ,  $r = 10.4636 \text{ \AA}$ ,  $J_{\text{dip}} = -0.022 \text{ cm}^{-1}$ .

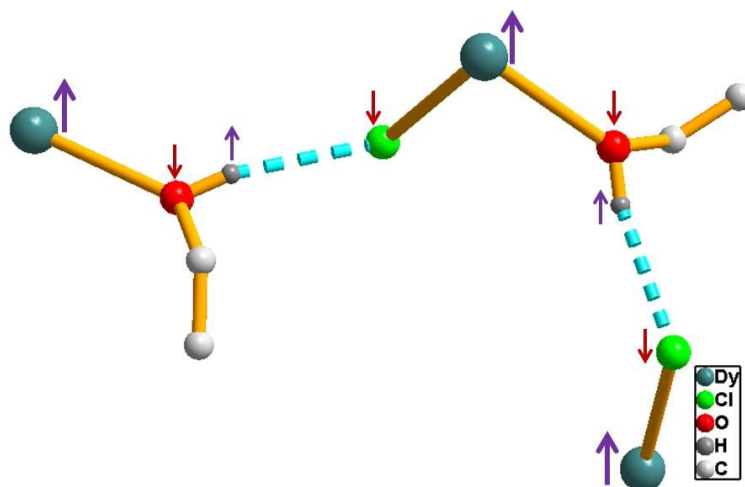

**Fig S18** Schematic diagram of the spin-polarization mechanism between two Dy<sup>III</sup> centres of neighbouring molecules through hydrogen bonding.

## References

- S1 F. Aquilante, J. Autschbach, R. K. Carlson, L. F. Chibotaru, M. G. Delcey, L. De Vico, I. F. Galván, N. Ferré, L. M. Frutos, L. Gagliardi, M. Garavelli, A. Giussani, C. E. Hoyer, G. Li Manni, H. Lischka, D. Ma, P. Å. Malmqvist, T. Müller, A. Nenov, M. Olivucci, T. B. Pedersen, D. Peng, F. Plasser, B. Pritchard, M. Reiher, I. Rivalta, I. Schapiro, J. Segarra-Martí, M. Stenrup, D. G. Truhlar, L. Ungur, A. Valentini, S. Vancoillie, V. Veryazov, V. P. Vysotskiy, O. Weingart, F. Zapata, and R. Lindh, *J. Comput. Chem.*, 2016, 37, 506-541.
- S2 L. F. Chibotaru, *Struc. Bonding* (Berlin, Ger.) 2014, 164, 185-230.
- S3 U. Liviu and L. F. Chibotaru, *Inorg. Chem.*, 2016, 55, 10043-10056; J. J. Baldoví, Y. Duan, R. Morales, A. Gaita-Ariño, E. Ruiz and E. Coronado, *Chem. Eur. J.*, 2016, 22, 13532-13539.
- S4 U. Liviu and L. F. Chibotaru, *Phys. Chem. Chem. Phys.*, 2011, 13, 20086- 20090.
- S5 L. F. Chibotaru and L. Ungur, *J. Chem. Phys.*, 2012, 137, 064112 (1-22).
- S6 L. F. Chibotaru, L. Ungur and A. Soncini, *Angew. Chem. Int. Ed.*, 2008, 47, 4126- 4129.
- S7 L. Ungur, W. Vanden Heuvel and L. F. Chibotaru, *New J. Chem.*, 2009, 33, 1224-1230.
- S8 L. F. Chibotaru, L. Ungur, C. Aronica, H. Elmoll, G. Pilet and D. Luneau, *J. Am. Chem. Soc.*, 2008, 130, 12445- 12455.
- S9 M. E. Lines, *J. Chem. Phys.*, 1971, 55, 2977-2984.
- S10 K. C. Mondal, A. Sundt, Y. H. Lan, G. E. Kostakis, O. Waldmann, L. Ungur, L. F. Chibotaru, C. E. Anson and A. K. Powell, *Angew. Chem. Int. Ed.* 2012, 51, 7550-7554.



S11 S. K. Langley, D. P. Wielechowski, V. Vieru, N. F. Chilton, B. Moubaraki, B. F. Abrahams, L. F. Chibotaru and K. S. Murray, *Angew. Chem. Int. Ed.*, 2013, 52, 12014-12019.
